# Supplementary material
Source: PubMed Central journal article supplement (PMC2607380)

### A) ND4

— 5 changes

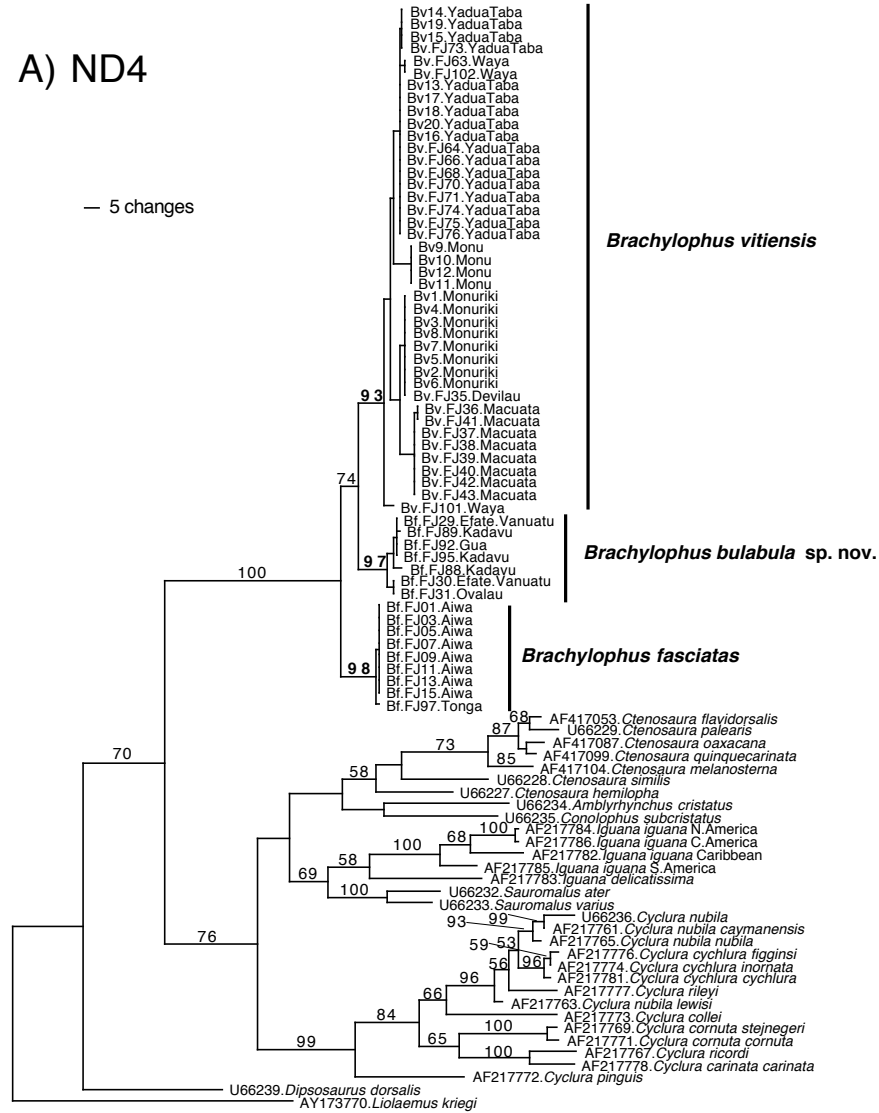

### B) Cytochrome b

— 5 changes

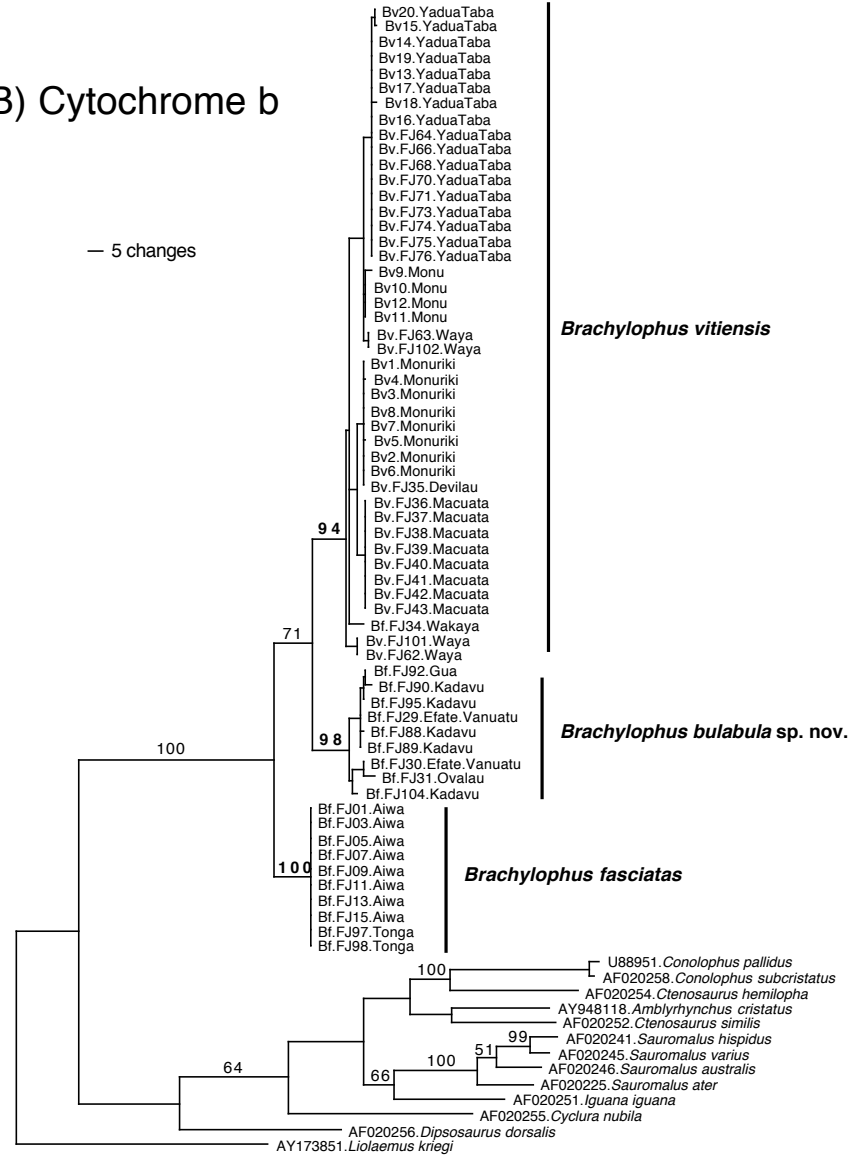

Supplement: rstb20080120s07.pdf [file rstb20080120s07.pdf]
